# Supplementary material for: The Ca2+-activated cation channel TRPM4 is a positive regulator of pressure overload-induced cardiac hypertrophy
Source: eLife. 2021 Jun 30;10:e66582. doi: 10.7554/eLife.66582 (PMC8245133; doi:10.7554/eLife.66582)
Supplement: Figure 1—source data 1. [file elife-66582-fig1-data1.xlsx]

## Sheet: A
	Sham							TAC
WT-2d-LV	0.833663	0.815671	1.23034	1.22961	0.831658	1.05906		0.428376	0.54562	0.372783	0.637377	0.37719	0.646207
WT-14d-LV	1.04503	0.956583	0.994373	1.00402				0.731176	0.718341	0.787123	0.598633

## Sheet: B
	Sham							TAC
WT-2d-CMs	0.951553	0.982678	0.87697	1.04868	1.24778	1.02932		0.419478	0.551146	0.506288	0.391816	0.349932	0.413022
WT-14d-CMs	1.04226	0.961293	0.937092	1.02208	1.03727			0.638628	0.649041	0.594486	0.586726	0.536893

## Sheet: D
	Sham						TAC
WT-2d-LV	0.837117	1.16787	0.869139	1.09323	1.03264		0.530016	0.578687	0.467192	0.553582	0.515512
WT-14d-LV	0.94688	1.04312	0.771256	1.01961	1.21913		0.739733	0.666971	0.606729	0.507777	0.5148

## Sheet: E
	Sham						TAC
WT-2d-CMs	0.793114	0.87977	1.16458	0.935601	1.22693		0.863661	0.928169	0.823064	0.825978	0.860531
WT-14d-CMs	0.810804	0.983188	0.882656	1.13469	1.18866		0.671186	0.730882	0.569517	0.485854	0.454832

## Sheet: Statistics
Figure	Statistical test	Comparison	Adjusted p-value	Star annotation
1A	Unpaired, two-tailed student's t-test	WT-2d: Sham vs. TAC	<0.0001	***
		WT-14d: Sham vs. TAC	0.038	*
1B	Unpaired, two-tailed student's t-test	WT-2d: Sham vs. TAC	<0.0001	***
		WT-14d: Sham vs. TAC	<0.0001	***
1D	Unpaired, two-tailed student's t-test	WT-2d: Sham vs. TAC	<0.0001	***
		WT-14d: Sham vs. TAC	0.0005	***
1E	Unpaired, two-tailed student's t-test	WT-2d: Sham vs. TAC	0.4082	ns
		WT-14d: Sham vs. TAC	0.0011	**
