# Supplementary material for: The Ca2+-activated cation channel TRPM4 is a positive regulator of pressure overload-induced cardiac hypertrophy
Source: eLife. 2021 Jun 30;10:e66582. doi: 10.7554/eLife.66582 (PMC8245133; doi:10.7554/eLife.66582)
Supplement: Figure 2—source data 1. [file elife-66582-fig2-data1.xlsx]

## Sheet: A
	Sham							TAC
WT	117	105	107	92	95	106		172	159	157	162	155	170
Trpm4 cKO	107	117	108	101	97	110		167	171	153	153	168	167	172

## Sheet: B
	Sham							TAC
WT	510	495	508	500	496	509		500	525	501	495	506	508
Trpm4 cKO	469	500	508	480	489	501		501	451	535	491	485	483	526

## Sheet: C
	Sham							TAC
WT	8123	11378	8817	10000	8900	9200		7039	9566	11339	11303	8111	10000
Trpm4 cKO	8839	11378	8817	8900	8890	10000		9154	9215	8189	9892	8542	8402	11000

## Sheet: D
	Sham							TAC
WT	-9000	-9234	-9800	-9900	-10000	-9023		-7099	-9330	-11245	-11750	-9199	-9234
Trpm4 cKO	-10147	-11980	-9986	-9013	-9089	-8023		-8230	-11441	-8790	-11773	-10209	-9029	-10000

## Sheet: E
	Sham								TAC
WT	138	149.3	140.1	129.8	134.4	139	140		156.4	148	130.5	156.3	138.9	153.3	150.2
Trpm4 cKO	127.1	133	148.9	139.4	144.2	138.8	134.2		139.4	148.8	131	139	150.4	153.3	146.3	144	147.2

## Sheet: G
		Sham									TAC
2 days	WT	25.2	26.9	25.4	26.1	25.2	29.2	26			26	24.6	23.5	23.8	28.2	28.5	27.6
	Trpm4 cKO	25.7	23.1	22.9	24.1	25	24.3	24.5	24.4		24.7	26.1	25.8	28	24.5	26
14 days	WT	27.4	28.2	25.6	24.5	23.8	26	28.3			27.6	25	25.6	26.1	26	27.7	28.2
	Trpm4 cKO	24.3	27.6	30.4	28.7	27.3	22.8	27.6			25.4	28.3	24.1	26.9	28.1	29.2	30.6	25.4	26.3

## Sheet: H
		Sham									TAC
2 days	WT	5	4.79554	4.76378	4.75096	4.92063	4.65753	4.84615			4.80769	5	4.76596	4.83193	4.96454	4.98246	5.03623
	Trpm4 cKO	4.63035	4.58875	4.9345	4.89627	4.8	4.73251	4.77551	5		5.1417	4.5977	4.96124	4.46429	4.97959	4.80769
14 days	WT	4.74453	4.8227	4.64844	4.73469	4.70588	4.46154	4.59364			6.5942	6.24	6.05469	6.16858	5.92308	5.99278	5.99291
	Trpm4 cKO	4.73251	4.71014	4.57237	4.77352	4.83516	4.82456	4.74638			6.02362	5.83039	5.60166	5.72491	5.44484	5.71918	5.39216	5.23622	5.1711

## Sheet: I
		Sham									TAC
2 days	WT	3.4127	3.49442	3.34646	3.37165	3.25397	3.28767	3.34615			3.46154	3.73984	3.40426	3.10924	3.82979	3.4386	3.84058
	Trpm4 cKO	3.15175	3.20346	3.58079	3.3195	3.4	3.20988	3.42857	3.19672		3.7247	3.37165	3.48837	3.21429	3.67347	3.69231
14 days	WT	3.39416	3.47518	3.32031	3.42857	3.27731	3.23077	3.42756			5.14493	5.12	4.60938	4.78927	4.61538	4.51264	4.57447
	Trpm4 cKO	3.33333	3.55072	3.38816	3.51916	3.58974	3.50877	3.26087			4.68504	4.4523	4.31535	4.23792	4.23487	4.21233	3.82353	3.97638	4.03042

## Sheet: J
		WT									KO
2 days	WT	4.91429	5.2809	4.94186	5.11628	4.73988	5.39326	4.97143			5.32544	5.28736	4.73373	4.32749	5.96685	5.44444	5.88889
	Trpm4 cKO	4.60227	4.40476	4.88095	4.79042	5.18293	4.7561	5.06024	4.67066		5.28736	4.88889	5.05618	5.26316	5.20231	5.36313
14 days	WT	5.34483	5.6	5	4.85549	4.50867	4.85549	5.44944			8.25581	7.39884	6.78161	7.10227	7.05882	7.35294	7.37143
	Trpm4 cKO	4.60227	5.44444	5.69061	5.64246	5.63218	4.73373	5.11364			6.68539	7.15909	6.01156	6.36871	6.76136	6.94915	6.5	5.87209	5.95506

## Sheet: L
	Sham				TAC
WT	3.58332	4.01746	4.21487		14.3596	10.1365	13.0123
Trpm4 cKO	5.05222	4.36889	5.11278		7.93278	9.48778	7.95611

[truncated: 2 more sheets: M, Statistics]
