# Supplementary material for: The Ca2+-activated cation channel TRPM4 is a positive regulator of pressure overload-induced cardiac hypertrophy
Source: eLife. 2021 Jun 30;10:e66582. doi: 10.7554/eLife.66582 (PMC8245133; doi:10.7554/eLife.66582)
Supplement: Figure 3—source data 1. [file elife-66582-fig3-data1.xlsx]

## Sheet: A
	Sham							TAC							ANP (Nppa)
WT	0.916625	1.23355	1.08085	0.649259	1.09773	1.02198		19.0737	5.01714	11.769	9.65756	20.7307	5.84115
Trpm4 cKO	0.969948	1.18166	0.893599	1.39155	0.840219	0.938105		3.13614	2.78	2.42425	2.74179	2.16442	3.50957
	Sham							TAC							BNP (Nppb)
WT	0.676756	0.830275	1.15501	0.96844	1.35099	1.01854		4.96665	2.69957	9.72161	7.53761	3.99319	2.87057
Trpm4 cKO	0.884658	1.01865	0.873482	1.1294	1.13486	0.857216		2.37059	1.57155	3.45762	1.98987	3.10885	1.74983
	Sham							TAC							α-SA (Acta1)
WT	1.13245	1.18104	0.696884	1.07932	1.03884	0.871461		2.56087	4.95028	3.06342	4.67386	2.44354	4.96945
Trpm4 cKO	1.00942	0.548972	3.85234	0.875252	0.959445	0.508032		5.75725	1.49547	1.89514	2.02295	4.85326	1.76896

## Sheet: B
	Sham							TAC							ANP (Nppa)
WT	1.18511	1.15714	1.25427	0.777084	0.795295	0.831096		10.747	19.6805	14.7976	11.6295	10.7972	6.91497
Trpm4 cKO	0.882437	0.741158	1.51828	1.28611	1.13987	0.606887		4.48985	5.08217	4.75382	7.54504	5.93986	5.51758
	Sham							TAC							BNP (Nppb)
WT	0.945977	0.981584	1.11611	0.625298	1.35072	0.980316		2.99783	11.0534	6.2055	3.61496	2.28134	9.44562
Trpm4 cKO	1.05027	0.617411	1.15589	0.972756	1.44049	0.817003		0.868253	1.45663	1.40169	1.54956	1.0393	1.41177
	Sham							TAC							α-SA (Acta1)
WT	0.862686	1.16816	0.898227	1.1904	1.10504	0.775487		10.5549	8.15964	9.1872	2.83977	8.39373	3.44302
Trpm4 cKO	1.08332	0.694422	0.860133	2.10231	0.955743	0.641327		2.68756	2.69108	3.65861	7.7612	2.48393	2.8744

## Sheet: Statistics
Figure	Statistical test	Comparison	Adjusted p-value	Star annotation
3A	Two-way ANOVA with Tukey's multiple comparisons test	ANP
		WT:Sham vs. WT:TAC	<0.0001	***
		WT:Sham vs. Trpm4 cKO:Sham	>0.9999	ns
		WT:Sham vs. Trpm4 cKO:TAC	0.7861	ns
		WT:TAC vs. Trpm4 cKO:Sham	<0.0001	***
		WT:TAC vs. Trpm4 cKO:TAC	0.0006	***
		Trpm4 cKO:Sham vs. Trpm4 cKO:TAC	0.7959	ns
	Two-way ANOVA with Tukey's multiple comparisons test	BNP
		WT:Sham vs. WT:TAC	0.0003	***
		WT:Sham vs. Trpm4 cKO:Sham	>0.9999	ns
		WT:Sham vs. Trpm4 cKO:TAC	0.3815	ns
		WT:TAC vs. Trpm4 cKO:Sham	0.0003	***
		WT:TAC vs. Trpm4 cKO:TAC	0.0116	*
		Trpm4 cKO:Sham vs. Trpm4 cKO:TAC	0.3711	ns
	Two-way ANOVA with Tukey's multiple comparisons test	α-SA
		WT:Sham vs. WT:TAC	0.0061	**
		WT:Sham vs. Trpm4 cKO:Sham	0.9783	ns
		WT:Sham vs. Trpm4 cKO:TAC	0.0654	ns
		WT:TAC vs. Trpm4 cKO:Sham	0.0148	*
		WT:TAC vs. Trpm4 cKO:TAC	0.6932	ns
		Trpm4 cKO:Sham vs. Trpm4 cKO:TAC	0.139	ns
3B	Two-way ANOVA with Tukey's multiple comparisons test	ANP
		WT:Sham vs. WT:TAC	<0.0001	***
		WT:Sham vs. Trpm4 cKO:Sham	>0.9999	ns
		WT:Sham vs. Trpm4 cKO:TAC	0.0112	*
		WT:TAC vs. Trpm4 cKO:Sham	<0.0001	***
		WT:TAC vs. Trpm4 cKO:TAC	0.0002	***
		Trpm4 cKO:Sham vs. Trpm4 cKO:TAC	0.0117	*
	Two-way ANOVA with Tukey's multiple comparisons test	BNP
		WT:Sham vs. WT:TAC	0.0008	***
		WT:Sham vs. Trpm4 cKO:Sham	>0.9999	ns
		WT:Sham vs. Trpm4 cKO:TAC	0.9927	ns
		WT:TAC vs. Trpm4 cKO:Sham	0.0008	***
		WT:TAC vs. Trpm4 cKO:TAC	0.0015	**
		Trpm4 cKO:Sham vs. Trpm4 cKO:TAC	0.9934	ns
	Two-way ANOVA with Tukey's multiple comparisons test	α-SA
		WT:Sham vs. WT:TAC	0.0001	***
		WT:Sham vs. Trpm4 cKO:Sham	>0.9999	ns
		WT:Sham vs. Trpm4 cKO:TAC	0.1009	ns
		WT:TAC vs. Trpm4 cKO:Sham	0.0001	***
		WT:TAC vs. Trpm4 cKO:TAC	0.0274	*
		Trpm4 cKO:Sham vs. Trpm4 cKO:TAC	0.1111	ns
