# Supplementary material for: The Ca2+-activated cation channel TRPM4 is a positive regulator of pressure overload-induced cardiac hypertrophy
Source: eLife. 2021 Jun 30;10:e66582. doi: 10.7554/eLife.66582 (PMC8245133; doi:10.7554/eLife.66582)
Supplement: Figure 4—figure supplement 2—source data 1. [file elife-66582-fig4-figsupp2-data1.xlsx]

## Sheet: Fig4-sup2
	Sham							TAC							CaMKIId
WT	1.09514	0.71282	1.29064	0.942016	1.03338	0.92601		1.57354	1.35404	0.793365	1.27538	0.878057	1.20087
Trpm4 cKO	1.01081	1.10289	0.815287	1.18636	1.03761	0.847041		0.746282	0.464384	0.533941	0.588344	0.524085	0.375993
	Sham							TAC							p-CaMKII
WT	1.08891	0.843371	1.15317	0.943681	1.09922	0.871654		0.859188	0.760086	1.1953	1.03114	0.847467	0.843947
Trpm4 cKO	1.49092	1.21565	1.04433	0.63642	0.824102	0.78858		0.4295	0.51571	0.558362	0.750837	0.772891	1.10066
	Sham							TAC
WT	0.836669	0.678033	1.35913	0.76085	1.11415	1.25117		1.23845	2.53401	1.82677	1.47306	0.825194	2.98791		p-HDAC4
Trpm4 cKO	0.863261	0.974266	0.679096	1.51755	1.34181	0.62402		0.708116	0.715892	0.673518	0.68811	0.610856	0.602127

## Sheet: Statistics
Figure	Statistical test	Comparison	Adjusted p-value	Star annotation
4-sup2	Unpaired, two-tailed student's t-test	CaMKIId
		WT: Sham vs. WT:TAC	0.2414	ns
		Trpm4 cKO:Sham vs. Trpm4 cKO:TAC	0.0001	***
	Unpaired, two-tailed student's t-test	p-CaMKII
		WT: Sham vs. WT:TAC	0.3823	ns
		Trpm4 cKO:Sham vs. Trpm4 cKO:TAC	0.0838	ns
	Unpaired, two-tailed student's t-test	p-HDAC4
		WT: Sham vs. WT:TAC	0.0432	*
		Trpm4 cKO:Sham vs. Trpm4 cKO:TAC	0.0483	*
