# Supplementary material for: The Ca2+-activated cation channel TRPM4 is a positive regulator of pressure overload-induced cardiac hypertrophy
Source: eLife. 2021 Jun 30;10:e66582. doi: 10.7554/eLife.66582 (PMC8245133; doi:10.7554/eLife.66582)
Supplement: Figure 4—source data 1. [file elife-66582-fig4-data1.xlsx]

## Sheet: B
															Cytoplasmic
	Sham							TAC							CaMKIId
WT	0.987846	0.843354	1.27062	0.898468	1.03781	0.9619		1.86672	2.04563	1.38643	1.82079	1.24883	1.48178
Trpm4 cKO	0.898295	1.08644	0.845269	1.08706	0.997548	1.08538		0.929037	0.563189	0.551547	0.630393	0.700735	0.631814
	Sham							TAC							p-CaMKII
WT	1.10552	0.769538	1.06988	0.98069	1.08275	0.991618		1.17297	1.1296	1.10002	1.49	1.05626	1.27791
Trpm4 cKO	1.29985	0.897082	1.23075	0.850466	0.782953	0.938901		0.496797	0.595623	0.632152	0.697957	0.712048	0.634001
	Sham							TAC							HDAC4
WT	0.928045	0.830135	1.87477	0.720942	0.797859	0.848247		1.96027	2.1262	1.35088	2.32061	1.32448	1.82595
Trpm4 cKO	0.884792	1.09306	0.963511	0.74743	1.1242	1.18701		1.2463	0.938727	1.09641	1.1363	1.36528	0.983597
	Sham							TAC							p-HDAC4
WT	0.701455	0.762898	1.46156	0.961101	0.930747	1.18223		1.97975	2.02435	1.80652	2.59082	1.35378	1.7837
Trpm4 cKO	1.05927	1.15365	1.09397	0.593689	1.11239	0.987033		1.28998	0.997824	1.12531	1.22721	1.34042	1.47587
	Sham							TAC							HDAC4
WT	1.07869	0.75144	1.88508	0.675672	0.722594	0.886527		2.03369	2.54274	1.22917	3.26143	1.95897	1.66381		nuclear export
Trpm4 cKO	0.841571	1.01035	0.635275	1.27196	1.31598	0.924861		1.15764	0.864009	0.710137	0.819631	0.85535	0.61481
															Nuclear
	Sham							TAC							CaMKIId
WT	0.892145	1.17016	0.973702	0.943322	0.993293	1.02738		1.17332	1.49421	1.72839	1.412	1.40668	1.22041
Trpm4 cKO	0.878499	0.97378	1.02488	0.905792	0.950361	1.26669		1.23061	1.19885	1.02113	1.05918	1.32173	1.66111
	Sham							TAC							p-CaMKII
WT	1.01233	0.909824	0.925099	1.03622	0.982184	1.13435		1.36127	1.48186	0.917639	1.44083	1.24278	1.50984
Trpm4 cKO	0.834925	0.706695	1.1286	1.27974	0.909836	1.1402		1.1077	1.10605	1.08421	0.890208	0.882265	0.551627
	Sham							TAC							HDAC4
WT	0.847968	1.08883	0.980224	1.05165	1.08827	0.943054		0.950031	0.824153	1.08321	0.701294	0.666383	1.08166
Trpm4 cKO	0.989476	1.01819	1.42741	0.553034	0.803987	1.2079		1.01322	1.02253	1.45307	1.30476	1.50222	1.50568
	Sham							TAC							p-HDAC4
WT	0.827031	1.10992	1.0608	1.24608	0.824067	0.932105		1.57692	0.788047	0.975518	1.73497	1.61833	0.588884
Trpm4 cKO	1.07888	1.04113	1.41639	0.343973	0.728911	1.39072		1.60172	1.2255	1.46903	1.56808	1.92935	2.1551
	Sham							TAC							MEF2A
WT	0.786149	0.972864	1.69873	0.995215	0.816961	0.730082		1.74946	1.25411	1.67052	2.4431	2.18931	1.25795
Trpm4 cKO	1.2486	1.16146	0.92603	0.930878	0.770394	0.962638		1.55572	1.23173	1.28361	1.16505	1.24269	1.10495

## Sheet: Statistics
Figure	Statistical test	Comparison	Adjusted p-value	Star annotation
4B		Cytoplasmic
	Unpaired, two-tailed student's t-test	CaMKIId
		WT: Sham vs. WT:TAC	0.0011	**
		Trpm4 cKO:Sham vs. Trpm4 cKO:TAC	0.0009	***
	Unpaired, two-tailed student's t-test	p-CaMKII
		WT: Sham vs. WT:TAC	0.0322	*
		Trpm4 cKO:Sham vs. Trpm4 cKO:TAC	0.0025	**
	Unpaired, two-tailed student's t-test	HDAC4
		WT: Sham vs. WT:TAC	0.0072	**
		Trpm4 cKO:Sham vs. Trpm4 cKO:TAC	0.2043	ns
	Unpaired, two-tailed student's t-test	p-HDAC4
		WT: Sham vs. WT:TAC	0.001	***
		Trpm4 cKO:Sham vs. Trpm4 cKO:TAC	0.0494	*
	Unpaired, two-tailed student's t-test	HDAC4 nuclear export
		WT: Sham vs. WT:TAC	0.0089	**
		Trpm4 cKO:Sham vs. Trpm4 cKO:TAC	0.2384	ns
		Nuclear
	Unpaired, two-tailed student's t-test	CaMKIId
		WT: Sham vs. WT:TAC	0.0012	**
		Trpm4 cKO:Sham vs. Trpm4 cKO:TAC	0.0476	*
	Unpaired, two-tailed student's t-test	p-CaMKII
		WT: Sham vs. WT:TAC	0.0071	**
		Trpm4 cKO:Sham vs. Trpm4 cKO:TAC	0.6253	ns
	Unpaired, two-tailed student's t-test	HDAC4
		WT: Sham vs. WT:TAC	0.1998	ns
		Trpm4 cKO:Sham vs. Trpm4 cKO:TAC	0.0832	ns
	Unpaired, two-tailed student's t-test	p-HDAC4
		WT: Sham vs. WT:TAC	0.3352	ns
		Trpm4 cKO:Sham vs. Trpm4 cKO:TAC	0.0122	*
	Unpaired, two-tailed student's t-test	MEF2A
		WT: Sham vs. WT:TAC	0.0113	*
		Trpm4 cKO:Sham vs. Trpm4 cKO:TAC	0.0201	*
