# Supplementary material for: The Ca2+-activated cation channel TRPM4 is a positive regulator of pressure overload-induced cardiac hypertrophy
Source: eLife. 2021 Jun 30;10:e66582. doi: 10.7554/eLife.66582 (PMC8245133; doi:10.7554/eLife.66582)
Supplement: Figure 5—figure supplement 1—source data 1. [file elife-66582-fig5-figsupp1-data1.xlsx]

## Sheet: Fig5-sup1
	Sham							TAC							GSK3β
WT	0.891589	0.851009	1.13004	0.783472	1.34112	1.00276		0.978907	1.22352	0.868755	0.962725	1.31077	0.762593
Trpm4 cKO	0.819838	1.22088	1.1433	1.10983	0.799962	0.906192		0.836601	1.09742	0.980963	1.23735	0.848495	1.14699
	Sham							TAC							p-GSK3β
WT	1.01162	1.01337	1.30471	0.743139	0.979086	0.948082		0.930203	1.47812	0.915107	1.05227	0.671644	0.476505
Trpm4 cKO	0.716241	0.854161	1.22518	1.22068	1.10949	0.874244		0.641438	0.749604	0.70031	1.22139	0.883202	0.942836

## Sheet: Statistics
Figure	Statistical test	Comparison	Adjusted p-value	Star annotation
5-sup1	Unpaired, two-tailed student's t-test	GSK3β
		WT: Sham vs. WT:TAC	0.8848	ns
		Trpm4 cKO:Sham vs. Trpm4 cKO:TAC	0.8093	ns
	Unpaired, two-tailed student's t-test	p-GSK3β
		WT: Sham vs. WT:TAC	0.6265	ns
		Trpm4 cKO:Sham vs. Trpm4 cKO:TAC	0.2696	ns
