# Supplementary material for: The Ca2+-activated cation channel TRPM4 is a positive regulator of pressure overload-induced cardiac hypertrophy
Source: eLife. 2021 Jun 30;10:e66582. doi: 10.7554/eLife.66582 (PMC8245133; doi:10.7554/eLife.66582)
Supplement: Figure 5—source data 1. [file elife-66582-fig5-data1.xlsx]

## Sheet: B
															Cytoplasmic
	Sham							TAC							NFATc4
WT	0.921344	0.955073	1.30693	1.12218	0.732606	0.961858		1.20955	0.851914	0.686003	1.0973	1.16862	1.29178
Trpm4 cKO	1.16068	1.21244	0.924456	1.01668	0.824054	0.861693		0.82216	0.817667	0.777092	0.887885	0.747683	1.07001
	Sham							TAC							NFATc4
WT	1.12305	0.994769	1.21681	1.16101	0.669617	0.834741		0.845063	0.785217	0.67146	1.18099	1.49032	2.47666		nuclear export
Trpm4 cKO	1.0461	1.18648	0.830883	1.0012	0.917336	1.01799		0.755082	0.829252	0.743208	0.661222	0.47753	0.650562
	Sham							TAC							GSK3β
WT	0.874977	0.890742	1.11171	0.947055	1.20385	0.971661		0.95727	1.31401	0.872623	0.909042	1.22435	0.874434
Trpm4 cKO	1.00226	1.12309	1.03738	1.01166	0.900384	0.925231		0.86287	0.985977	0.857415	0.82869	0.922193	1.28412
	Sham							TAC							p-GSK3β
WT	1.13391	1.04044	1.05248	0.715146	1.07654	0.981481		0.91137	1.26721	0.942957	0.837758	0.651462	0.519129
Trpm4 cKO	0.756779	0.746845	1.13396	1.29317	1.22256	0.846683		0.875575	0.930588	0.801707	1.06978	1.08902	1.24048
															Nuclear
	Sham							TAC							NFATc4
WT	0.811269	0.94942	1.06212	0.955815	1.0819	1.13947		1.4154	1.07288	1.0103	0.918804	0.77542	0.515782
Trpm4 cKO	1.10874	1.02115	1.11183	1.01474	0.897675	0.84586		1.08806	0.985331	1.04485	1.34184	1.56462	1.64359
	Sham							TAC							GATA4
WT	0.686149	0.872864	1.29873	0.995215	1.31696	0.830082		0.989456	1.15341	1.35052	0.73104	1.18931	0.757947
Trpm4 cKO	1.06461	0.872171	0.997991	1.005	1.06023			1.18091	1.06825	1.19286	1.37188	1.37992
	Sham							TAC							GSK3β
WT	0.967301	1.03168	0.969677	1.19146	0.884778	0.955093		0.963879	1.05856	0.990054	0.930704	0.920684	1.13022
Trpm4 cKO	1.20092	0.903656	0.891333	0.895451	1.10566	1.00298		1.01319	0.882583	0.85862	0.657903	1.06767	1.09978
	Sham							TAC							p-GSK3β
WT	1.11137	1.018	0.799829	0.954161	1.0902	1.02644		0.971435	0.850034	1.02168	0.789388	0.961715	1.0802
Trpm4 cKO	1.05902	0.876365	0.927664	1.06182	1.10444	0.970695		1.36815	1.24429	1.14741	0.87788	1.23587	1.31871

## Sheet: Statistics
Figure	Statistical test	Comparison	Adjusted p-value	Star annotation
5B		Cytoplasmic
	Unpaired, two-tailed student's t-test	NFATc4
		WT: Sham vs. WT:TAC	0.6906	ns
		Trpm4 cKO:Sham vs. Trpm4 cKO:TAC	0.0993	ns
	Unpaired, two-tailed student's t-test	NFATc4 nuclear export
		WT: Sham vs. WT:TAC	0.4227	ns
		Trpm4 cKO:Sham vs. Trpm4 cKO:TAC	0.0012	**
	Unpaired, two-tailed student's t-test	GSK3β
		WT: Sham vs. WT:TAC	0.7961	ns
		Trpm4 cKO:Sham vs. Trpm4 cKO:TAC	0.5864	ns
	Unpaired, two-tailed student's t-test	p-GSK3β
		WT: Sham vs. WT:TAC	0.2613	ns
		Trpm4 cKO:Sham vs. Trpm4 cKO:TAC	0.9922	ns
		Nuclear
	Unpaired, two-tailed student's t-test	NFATc4
		WT: Sham vs. WT:TAC	0.7213	ns
		Trpm4 cKO:Sham vs. Trpm4 cKO:TAC	0.0476	*
	Unpaired, two-tailed student's t-test	GATA4
		WT: Sham vs. WT:TAC	0.8488	ns
		Trpm4 cKO:Sham vs. Trpm4 cKO:TAC	0.0088	**
	Unpaired, two-tailed student's t-test	GSK3β
		WT: Sham vs. WT:TAC	0.9859	ns
		Trpm4 cKO:Sham vs. Trpm4 cKO:TAC	0.4321	ns
	Unpaired, two-tailed student's t-test	p-GSK3β
		WT: Sham vs. WT:TAC	0.415	ns
		Trpm4 cKO:Sham vs. Trpm4 cKO:TAC	0.0322	*
