# Supplementary material for: The Ca2+-activated cation channel TRPM4 is a positive regulator of pressure overload-induced cardiac hypertrophy
Source: eLife. 2021 Jun 30;10:e66582. doi: 10.7554/eLife.66582 (PMC8245133; doi:10.7554/eLife.66582)
Supplement: Table 1—source data 1. [file elife-66582-table1-data1.xlsx]

## Sheet: HR
	Sham								TAC
WT	510	500	519	508	490	495	518		513	492	504	498	509	504	520

## Sheet: Aortic systolic  pressure
	Sham								TAC
WT	104	100	98	102	104	105	110		166	170	175	158	160	163	172

## Sheet: Aortic diastolic  pressure
	Sham								TAC
WT	75	74	76	78	77	80	73		70	72	74	78	76	74	69

## Sheet: LVSP
	Sham								TAC
WT	108	115	109	97	104	105	99		165	155	158	168	163	169	172

## Sheet: dP-dtmax
	WT								TAC
WT	9234	11378	8817	10000	8900	9200	8542		9012	9800	9812	11200	9700	10000	9345

## Sheet: dP-dtmin
	WT								TAC
WT	-10220	-9901	-9986	-11290	-9213	-8709	-8345		-9000	-9800	-11245	-11600	-9800	-9321	-9990

## Sheet: BW
	Sham												TAC
WT-2 days	28.6	28.7	28.9	27.1	28.12	28.43	28.2	30.25					28.5	30	29	28	26.65	26.19	25.93	27.43
WT-14 days	30	29	28.5	27.7	27.6	30.6	27.85	28.3	29.1	28.1	27.6		25	26.8	28	26.3	25.8	26.2	27.4	28.4	28.3	30.5	26.32

## Sheet: HW
	Sham												TAC
WT-2 days	134	134.3	143.7	135	131	148	137.9	130					132	130	129	135	128	135.1	138.1	135
WT-14 days	135	129	138	129.9	129.9	144.3	121.5	139	128	135.4	133.8		171.6	169.1	164	162.1	166.4	166.6	184	193.3	195.4	176.9	187.6

## Sheet: LVW
	Sham												TAC
WT-2 days	99.7	95	103	95	90.5	104.1	91.8	104.6					95	98	99	102	92.7	92.5	102.1	100
WT-14 days	105	95	100	95.6	97	105.1	88.5	89	90	100	95		134.8	138.5	134	134.8	130	131.7	135	137.5	144.4	132.8	143.4

## Sheet: LW
	Sham												TAC
WT-2 days	141.1	139.3	145.2	146.1	142.2	142.2	140.2	139.2					143.9	141.6	144.5	147.8	150.1	144.6	138.9	137.6
WT-14 days	138.8	147.2	144.3	140.3	156.1	149.2	148.2	148.3	158.1	141.7	144.1		147.7	147.9	152.5	141.9	149.8	152.2	146.1	158.4	141.1	136.2	143.7

[truncated: 8 more sheets: TL, HW-BW, LVW-BW, LVW-TL, LW-BW, Fibrosis areas, Collagen III, Statistics]
