# Supplementary material for: The Ca2+-activated cation channel TRPM4 is a positive regulator of pressure overload-induced cardiac hypertrophy
Source: eLife. 2021 Jun 30;10:e66582. doi: 10.7554/eLife.66582 (PMC8245133; doi:10.7554/eLife.66582)
Supplement: Table 2—source data 1. [file elife-66582-table2-data1.xlsx]

## Sheet: ANP2days
	Sham					TAC
WT-2 days	0.926693	1.42021	0.860557	0.792538		12.4272	10.5425	7.41206	9.04593

## Sheet: BNP2days
	Sham					TAC
WT-2 days	1.26924	0.734464	1.06033	0.935966		8.56543	5.68658	9.52958	8.45254

## Sheet: α-SA2days
	Sham					TAC
WT-2 days	0.770163	0.984549	0.944134	1.30115		4.5886	4.11362	3.54441	5.66639

## Sheet: ANP14days
	Sham						TAC
WT-14 days	0.926321	1.33889	0.908468	0.707589	1.11873		9.13063	10.0215	10.5126	11.0852	7.32861

## Sheet: BNP14days
	Sham						TAC
WT-14 days	0.82214	1.69916	0.767741	0.650164	1.06079		8.87565	6.24593	6.92393	7.56996	7.8302

## Sheet: α-SA14days
	Sham						TAC
WT-14 days	1.14128	1.32377	0.815818	0.757156	0.96198		4.63438	4.7331	4.96128	3.41596	3.24073

## Sheet: Statistics
Table	Statistical test	Comparison		Adjusted p-value	Star annotation
2	Unpaired, two-tailed student's t-test	ANP	WT-2d: Sham vs. TAC	0.0033	**
	Unpaired, two-tailed student's t-test	BNP	WT-2d: Sham vs. TAC	0.003	**
	Unpaired, two-tailed student's t-test	α-SA	WT-2d: Sham vs. TAC	0.0033	**
	Unpaired, two-tailed student's t-test	ANP	WT-14d: Sham vs. TAC	<0.0001	***
	Unpaired, two-tailed student's t-test	BNP	WT-14d: Sham vs. TAC	<0.0001	***
	Unpaired, two-tailed student's t-test	α-SA	WT-14d: Sham vs. TAC	<0.0001	***
